# Supplementary material for: Multi-Scenario Radiative Human Body Cooling with a Selective Emission-Transmission Textile
Source: Research Square preprint supplement (doi:10.21203/rs.3.rs-1991851/v1), 2022-08-30
Supplement: Supplementary file 1 [file 80f9d911a7ea070ec071eae3.docx]

Supplementary Materials for

**Multi-Scenario Radiative Human Body Cooling with a Selective Emission-Transmission Textile**

Xueke Wu1†, Jinlei Li2†, Qinyuan Jiang1, Wenshuo Zhang1, Baoshun Wang1, Run Li1, Siming Zhao1, Fei Wang1, Ya Huang1, Pei Lyu1, Yanlong Zhao1, Jia Zhu2*, Rufan Zhang1*

1Beijing Key Laboratory of Green Chemical Reaction Engineering and Technology, Department of Chemical Engineering, Tsinghua University, Beijing 100084, China.

2National Laboratory of Solid State Microstructures, College of Engineering and Applied Sciences, Jiangsu Key Laboratory of Artificial Functional Materials, Collaborative Innovation Center of Advanced Microstructures, Nanjing University, Nanjing 210023, China.

†These authors contributed equally to this work.

*** Email: jiazhu@nju.edu.cn; zhangrufan@tsinghua.edu.cn**

Supplementary Text

**Skin surface temperature simulation in indoor and outdoor scenarios**

We constructed two heat transfer models of textile-covered human skin to quantitatively evaluate the radiative cooling performance of a selective emission-transmission RC textile (SET-textile) in both the indoor (Supplementary Fig. 2) and sunny outdoor (Supplementary Fig. 3) scenarios. We simplified the heat transfer process to a one-dimensional steady state problem. The RC performance was evaluated by the skin surface temperature in the models (Figs. 1G-I). Two models were used to analyze the quantitative relationship between the heat transfer coefficient of the textile and the skin surface temperature at a specific ambient temperature (*Tamb*) and metabolic heat generation flux of the human body.

**Indoor simulation**

The net radiation method1 was used to analyze the heat transfer effect of the RC model. Supplementary Fig. 1 shows the heat transfer model in the indoor scenario, which included four heat transfer surfaces: the skin (surface 1), the textile inner surface (surface 2) and textile outer surface (surface 3), and the interior wall or ambient air (surface 4). The inward and outward radiative heat fluxes are denoted as *qi* and *qo*, respectively.

Based on Stefan-Boltzmann law and energy conservation, the energy balance equations for these four interfaces are

For the skin surface (surface1):

*qo1* = *ε1 σT14* + *(1* - *ε1) qi1* (1)

For the textile inner surface (surface2):

*qo2* = *ε σT24* + *ρ qi2* + *τ qi3* (2)

For the textile outer surface (surface3):

*qo3* = *ε σT34* + *ρ qi3* + *τ qi2* (3)

For the room wall surface (surface4):

*qo4* = *ε4 σT44* + *(1* - *ε4) qi4* (4)

The net radiation (*q*) for the entire system to achieve energy conservation is

*q* = *qo1* - *qo2 = qo3*- *qo4* (5)

, where *ε*, *ε1*, and *ε4* are the MIR emissivity of textile, skin, and room wall (*ε4* = 1), respectively. *ρ* and *τ* are the reflectivity and transmitivity of the textile, respectively. *σ* and *T* are the Stefan-Boltzmann constant and temperature, respectively. Since the SET-textile was idealized as an ideal non-reflective film, *ρ* = 0, and*τ*+ *ε* = 1. Thus, these equations were solved as

*q* = (6)

*q* = (7)

= (8)

*β=*  (9)

When non-radiative heat transfer was included, the inside textile and air gap between the skin and the textile mainly transfers heat by conduction1. Heat transfer between the textile and the environment is mainly by natural convection. These were described by Fourier's law and Newton's cooling law, which gave the equation

*qcond-airgap* = *kair*  (10)

*qcond-textile* = *ktextile*  (11)

*qconv* = *hnon* () (12)

, where *qcond-airgap* and *qcond-textile* are the conductive thermal flux in the air gap and the conductive heat flux inside the textile, respectively. *qconv* is the natural convective thermal flux between the textile and the ambient environment. The resulting energy balance equations combined with radiative and non-radiative thermal transfer are

For the air gap between skin and textile:

*q* = + *kair*  (13)

For the top surface of textile:

*q* = + *hnon* () (14)

For the inside of textile:

*q* =*ktextile + τ* (15)

= (16)

*β=*  (17)

, where the parameters are as shown in the Table S11-3.

On solving Eqns. (13-17), a quantitative relationship between the emissivity of the textile and skin surface temperature at a specific ambient temperature (Tamb = 25 ℃) was obtained, as shown in Fig. 1G (bottom curve). The thermal effects of wearing the three textiles of the transmission-type, emission-type, and SET hybrid-type were represented by the skin surface temperature of ε = 0, 1, 0.39, respectively.

**Outdoor simulation**

Supplementary Fig. 2 shows the heat transfer model in the outdoor scenario. As compared to the indoor model above, this model additionally introduced a cold outer space, an atmosphere, and solar radiation. The heat transfer balance equations for the four surfaces are similar to Eqns. (1-4) with *ρ* = 0, *τ*+ *ε* = 1, *ε4 = εatm*.

Since the atmosphere (Surface 4 in Supplementary Fig.2), unlike the room wall indoors, is MIR semi-transmissive, the heat transfer balance for this surface is

*qo4* = *εatm σT*44 (18)

When solar irradiation and non-radiative heat transfer are included, the energy balance equations2,3 are as following.

For the air gap between skin and textile:

*q* = + *kair* – γ P sun  (19)

γ = (20)

For the outer surface of the textile:

*q* = + *hnon* () ηP sun (21)

η = [()] (22)

For the inner surface of the textile2,4:

= (23)

On solving Eqns. (19-23), a quantitative relationship between the *ε* and *Tskin* at a specific ambient temperature of 27 ℃ (300.15 K) was obtained, as shown in Fig. 1G (top curve). The corresponding *ε* of the three textiles are 0 (transmission-type), 0.39 (SET Hybrid-type) and 1 (emission-type), respectively. The other parameters are shown in the Table S2.


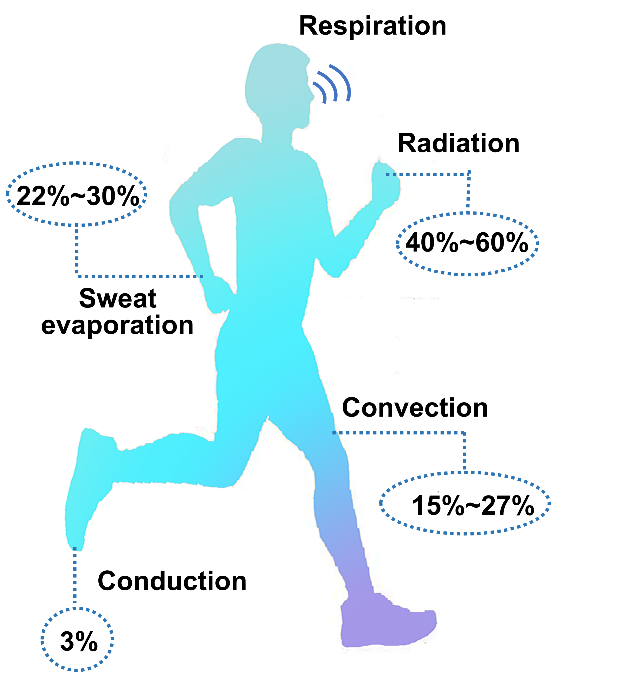


**Supplementary Figure 1.** Schematic for human body heat dissipation.


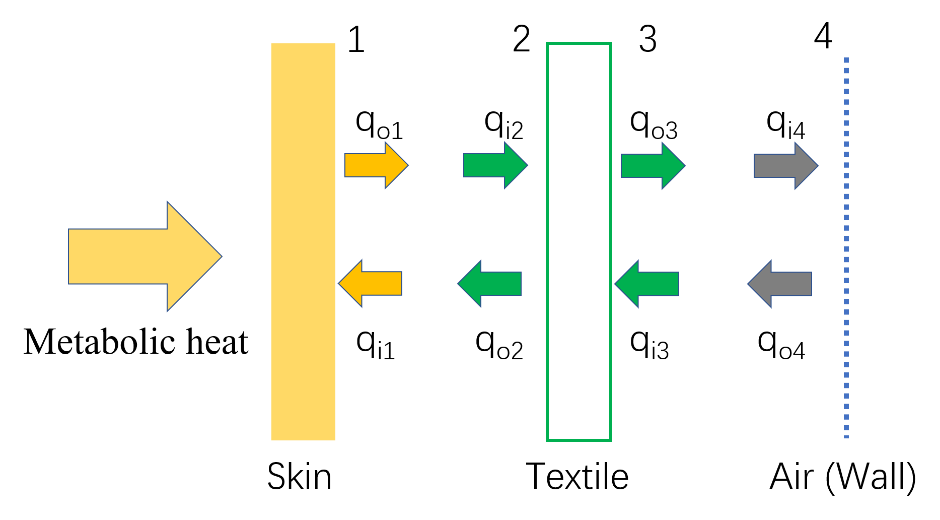


**Supplementary Figure 2.** Indoor heat transfer model showing the geometry used for indoor radiative heat transfer between skin and room wall separated by an emission-transmission textile.


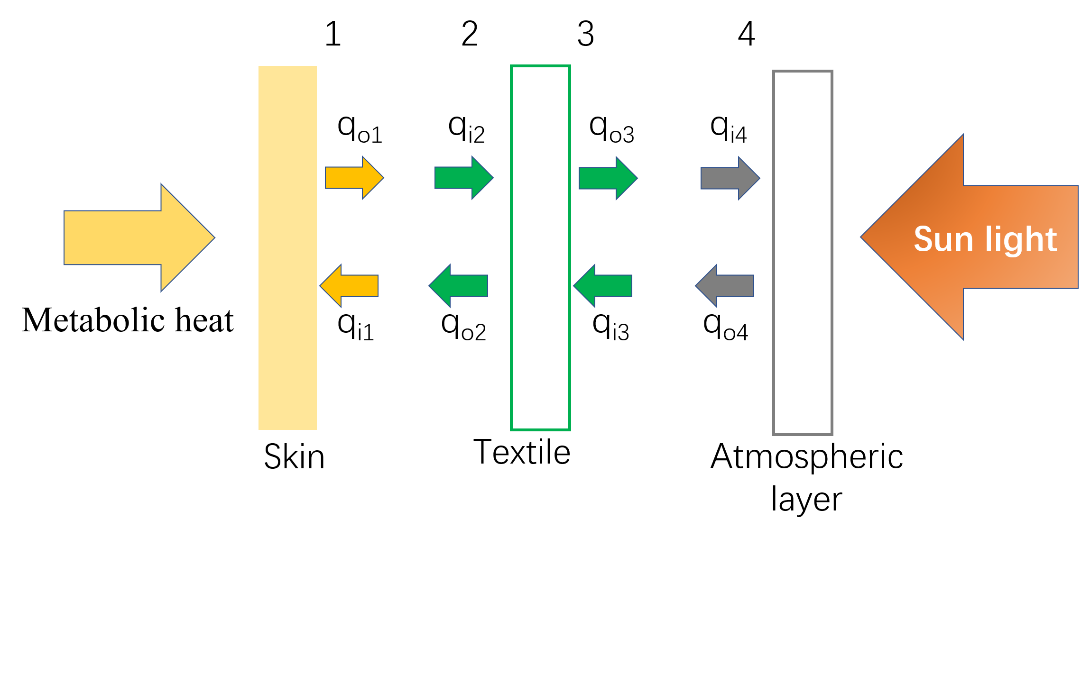


**Supplementary Figure 3.** Outdoor heat transfer model showing the geometry used for outdoor radiative heat transfer between skin and ambient environment separated by an emission-transmission textile.

**
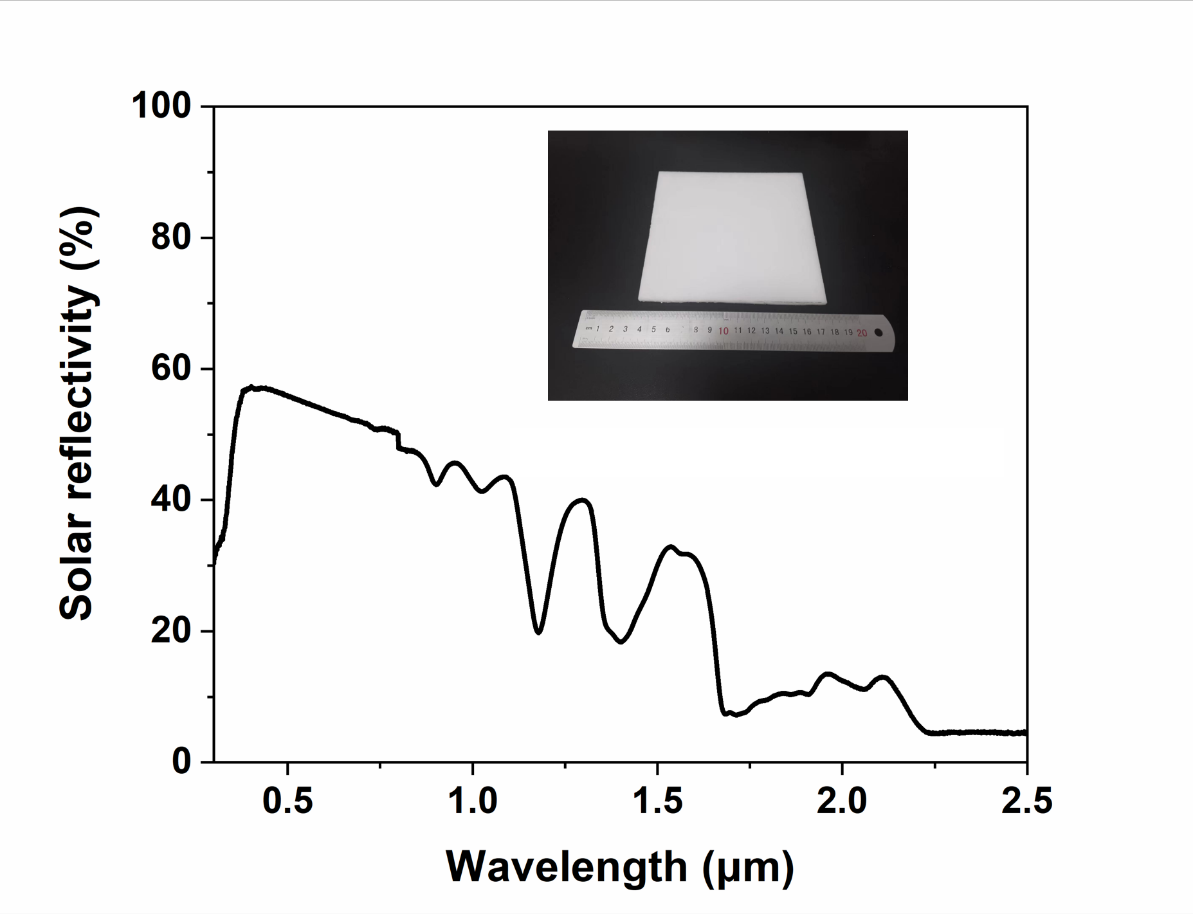
**

**Supplementary Figure 4.** Solar reflectance in the 0.3-2.5 μm wavelength range and digital image of the commercial POM plate (15*15 cm2).

**
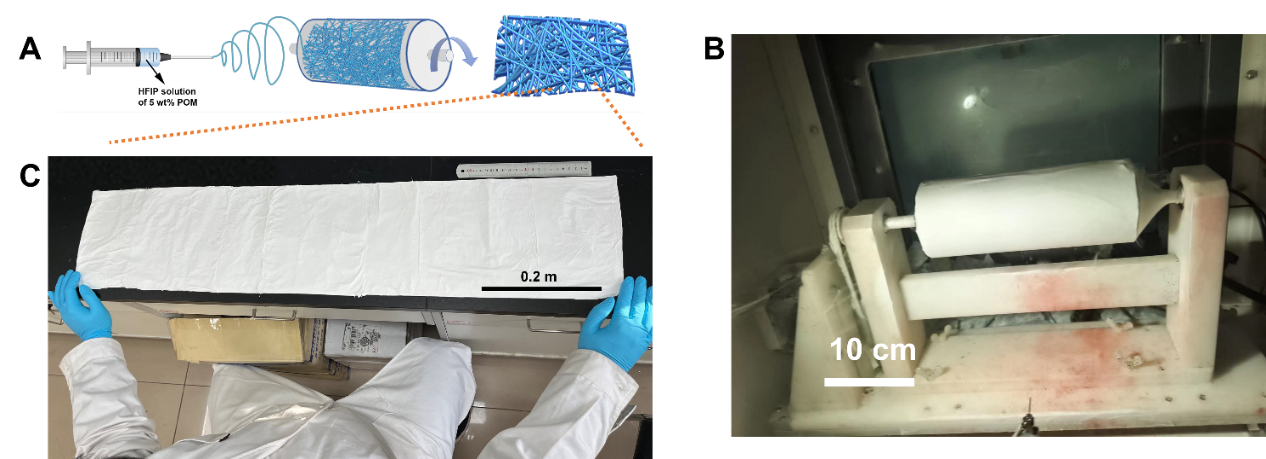
**

**Supplementary Figure 5. Fabrication of the POM textile. a** and **b**, Schematic (**a**) and digital image (**b**) of the electrospinning process. **c,** Digital image of the POM textile prepared by the electrospinning process.

**
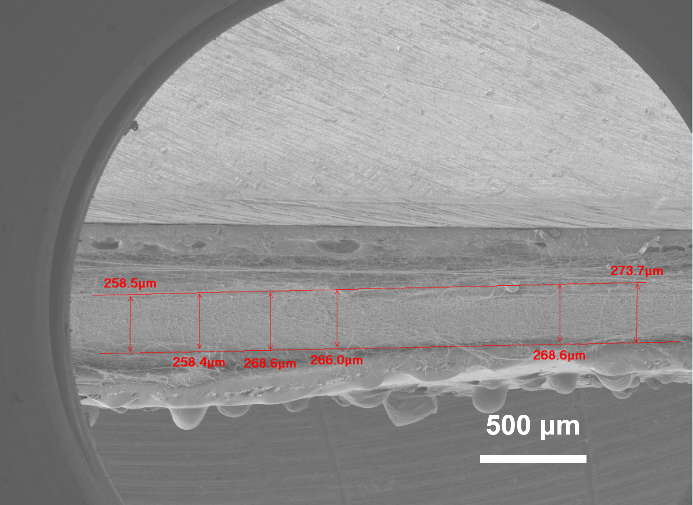
**

**Supplementary Figure 6.** Cross-sectional SEM image of the POM textile. The thickness of the POM textile is ~260 μm.


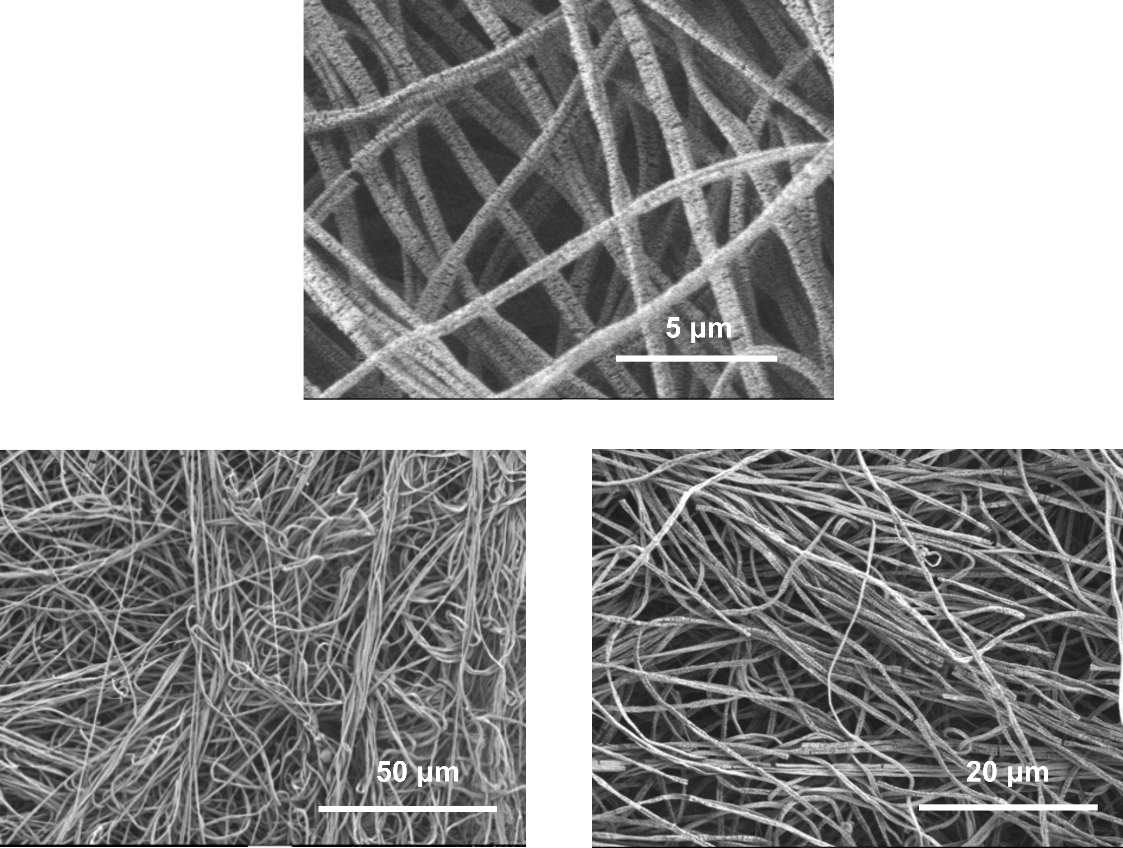


**Supplementary Figure 7.** SEM images of the POM textile.


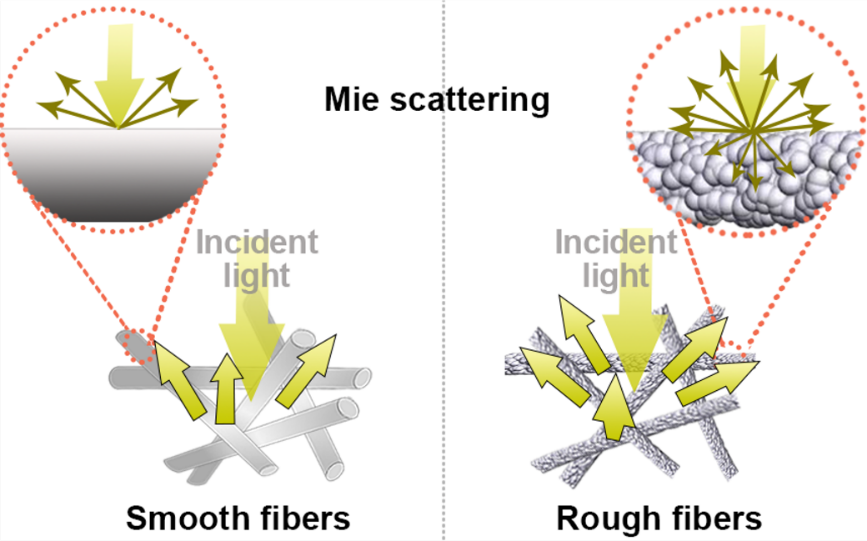


**Supplementary Figure 8.** Schematic of Mie scattering from smooth and rough fibers demonstrating that rough fibers give increased sunlight scattering (solar reflectance).

**
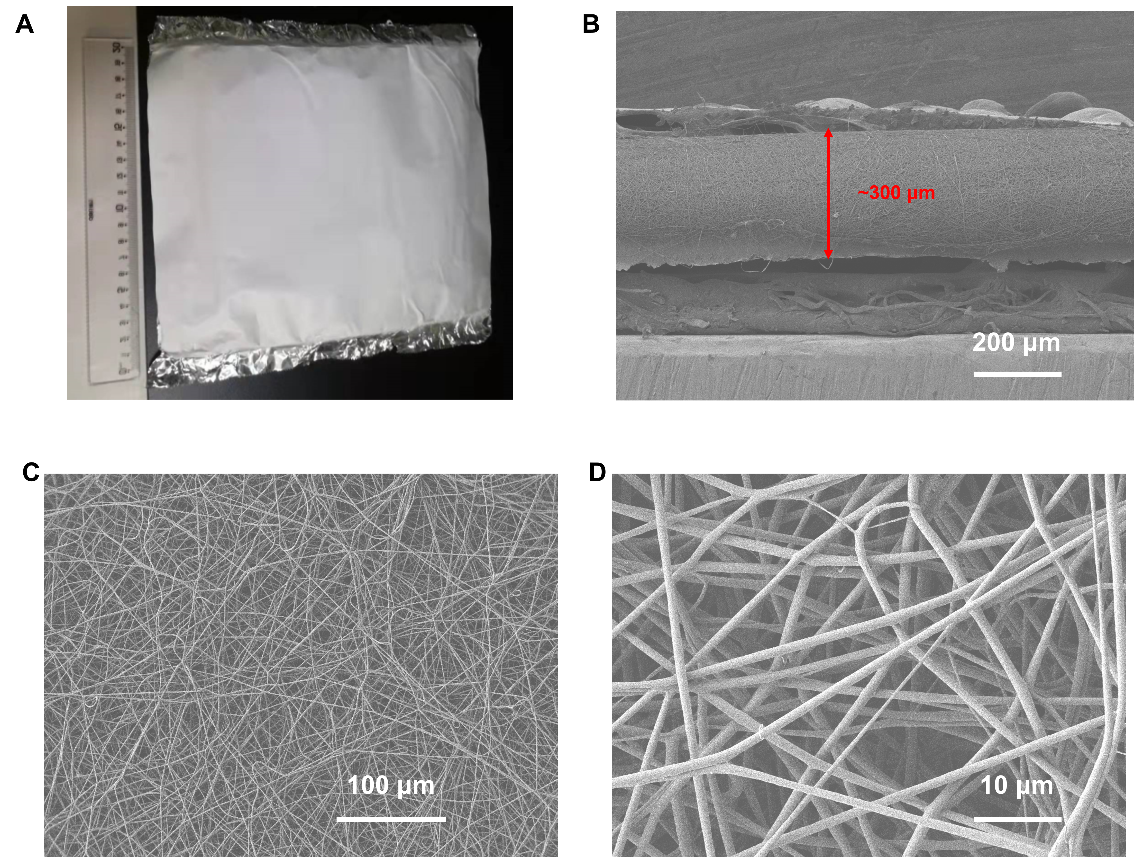
**

**Supplementary Figure 9.** **Images of the PVDF textile.** **a,** Digital image of the PVDF textile on a piece of aluminum foil. **b**, Cross-sectional SEM images of the PVDF textile. **c** and **d**, SEM images of the PVDF textile.


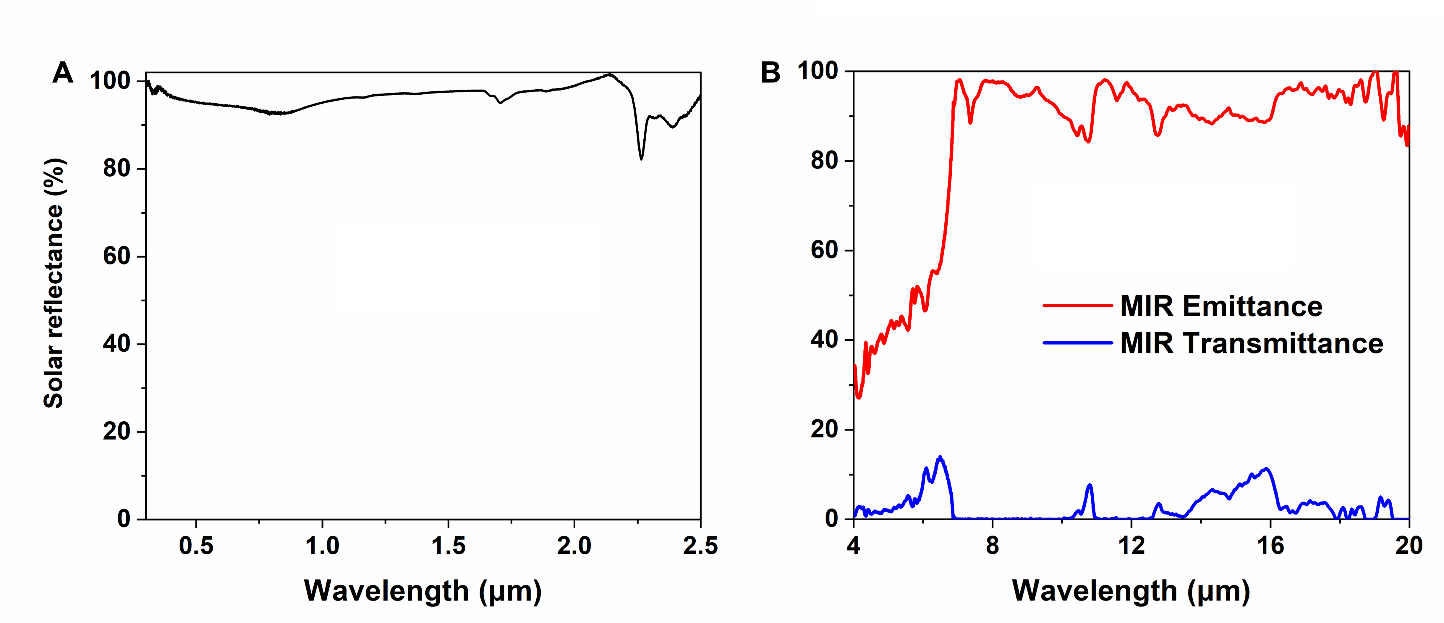


**Supplementary Figure 10.** **Optical spectrum of the PVDF textile. a**, Solar reflectance in the 0.3-2.5 μm wavelength range and **b**, MIR emittance and MIR transmittance in the 4-20 μm wavelength range of the emission-type PVDF textile. The PVDF textile (~300 μm thick, synthesized by electrospinning, Supplementary Figure 7) exhibited both high solar reflectance (~95.0%) and high MIR emittance (~90%) and therefore was selected as a typical emission-type textile for comparison.

**
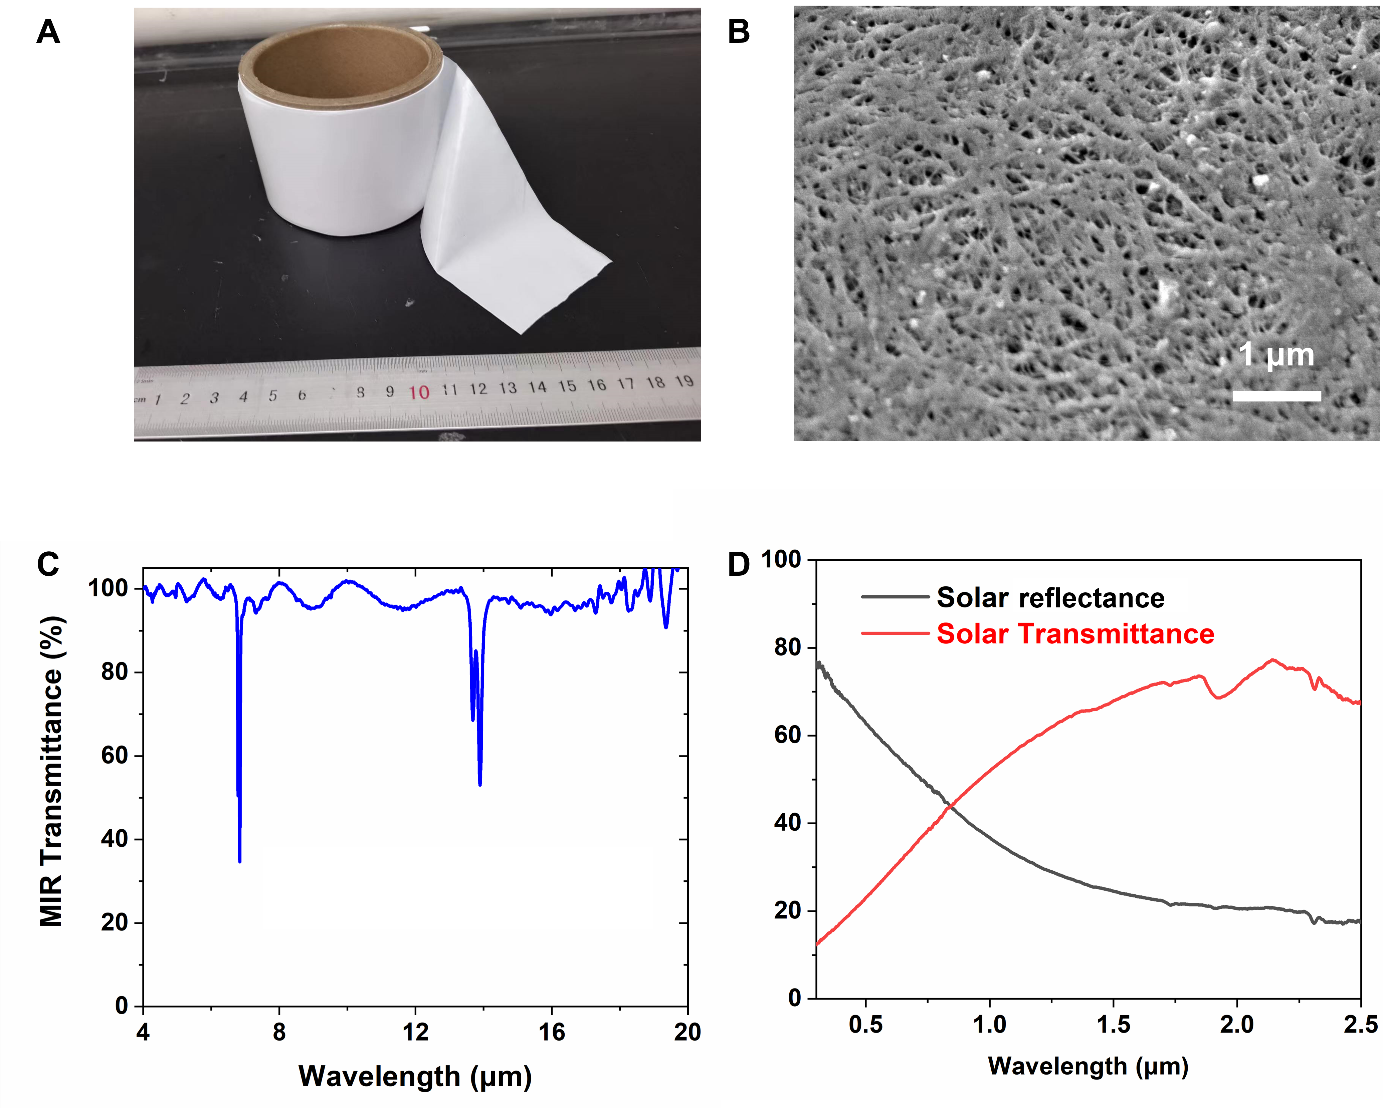
**

**Supplementary Figure 11. Characterizations of the PE textile.** (**a** and **b**) Digital (**a**) and SEM (**b**) images of the transmission-type PE textile. **c**, MIR transmittance of the transmission-type PE textile in the 4-20 μm wavelength range. **d**, Solar reflectance and transmittance of the transmission-type PE textile in the 0.3-2.5 μm wavelength range. The nanoporous PE (~16 μm-thick) is a commercial white textile with a highly porous microstructure and exhibits an ultrahigh MIR transmittance of ~96.9%. Therefore, it was selected as a transmission-type textile for comparison.


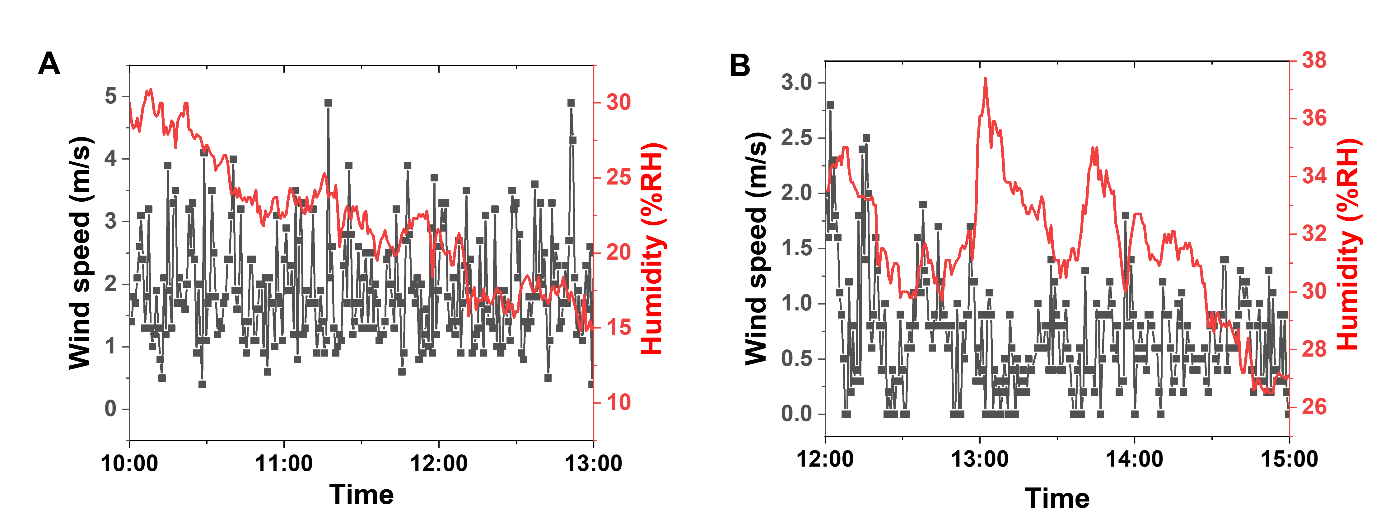


**Supplementary Figure 12.** **Ambient conditions of the outdoor thermal measurement.** Wind speed and humidity during the thermal measurements in sunny outdoor (**a**) and cloudy outdoor (**b**) scenarios.

**
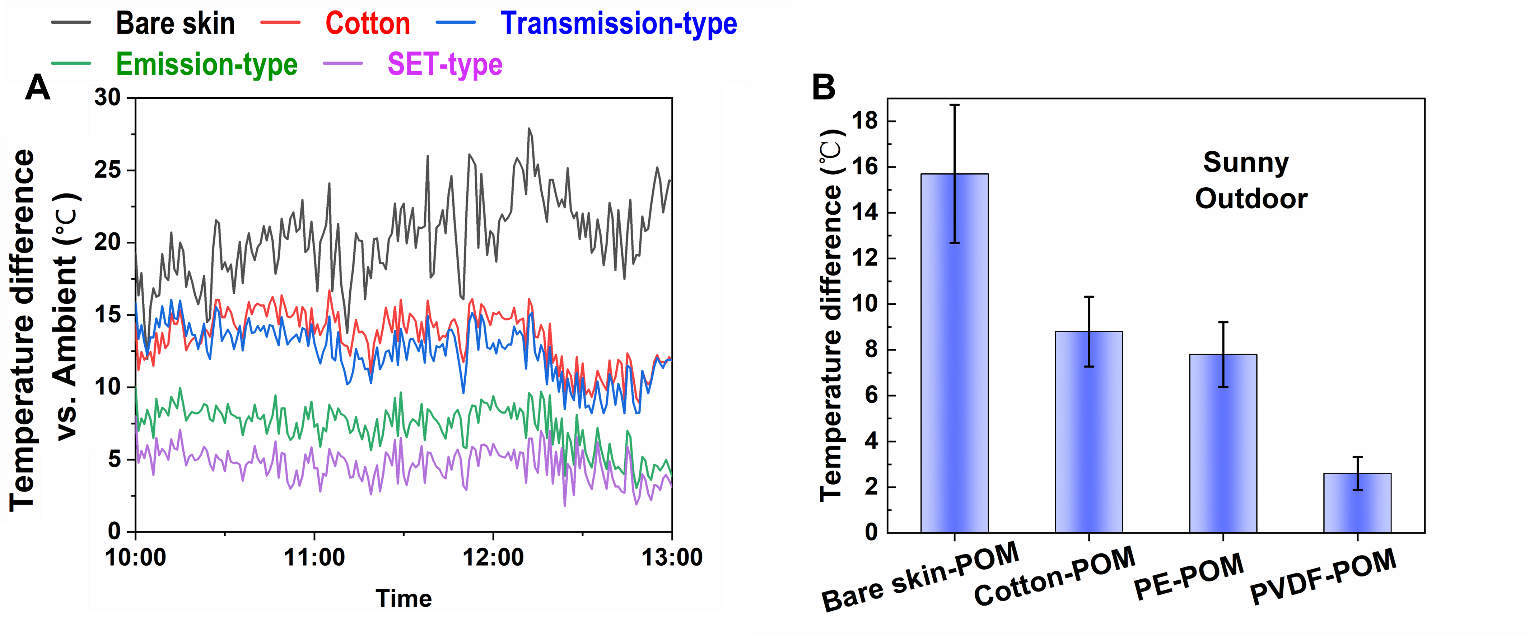
**

**Supplementary Figure 13.** **Sunny outdoor thermal measurement.** **a**, Temperature difference between ambient air and skin simulators covered by the five samples (uncovered, cotton, transmission-type PE, emission-type PVDF, and SET-type POM textiles). **b**, The average temperature difference of skin simulators wearing POM and wearing the other four samples.

**
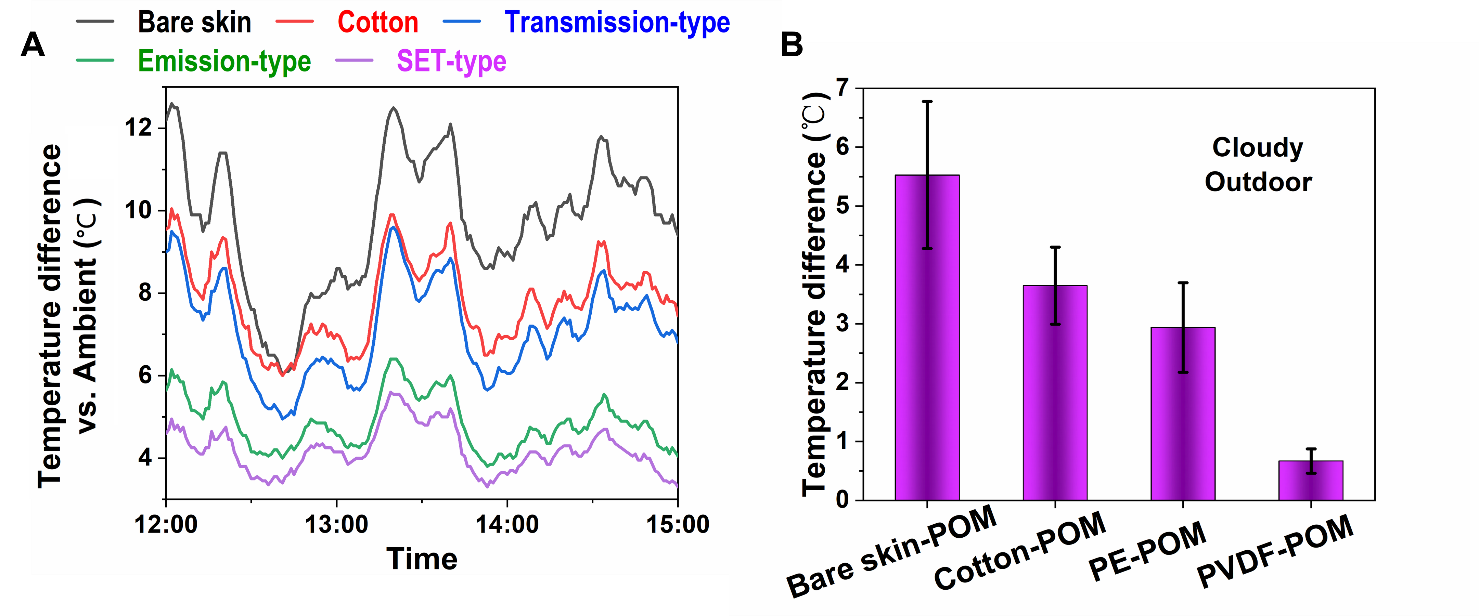
**

**Supplementary Figure 14.** **Cloudy outdoor thermal measurement. a**, Temperature difference between ambient air and skin simulators covered by the five samples (uncovered, cotton, transmission-type PE, emission-type PVDF, and SET-type POM textiles, respectively). **b**, The average temperature difference of skin simulators wearing POM and wearing the other four samples.


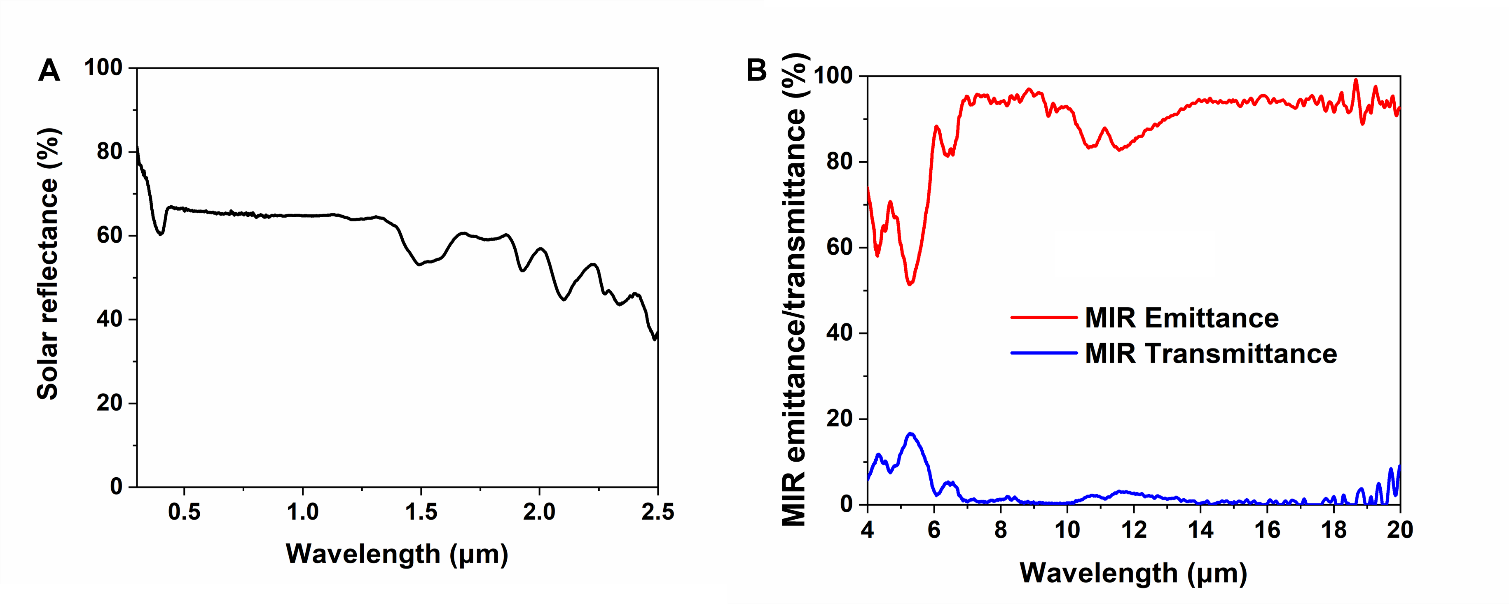


**Supplementary Figure 15.** **Optical spectrum of the commercial cotton. a**, Commercial cotton’s solar reflectance in the 0.3-2.5 μm wavelength range and **b**, MIR emittance and MIR transmittance in the 4-20 μm wavelength range.

**
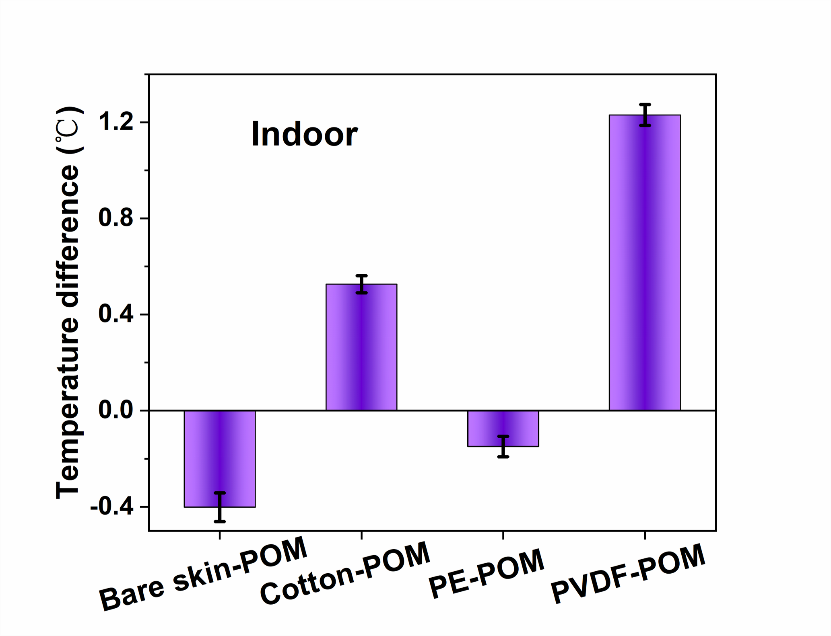
**

**Supplementary Figure 16.** Average temperature difference of skin simulators covered by the SET-type POM textile and the other four samples (uncovered, cotton, transmission-type PE, and emission-type PVDF textiles) in the indoor thermal measurements.

**
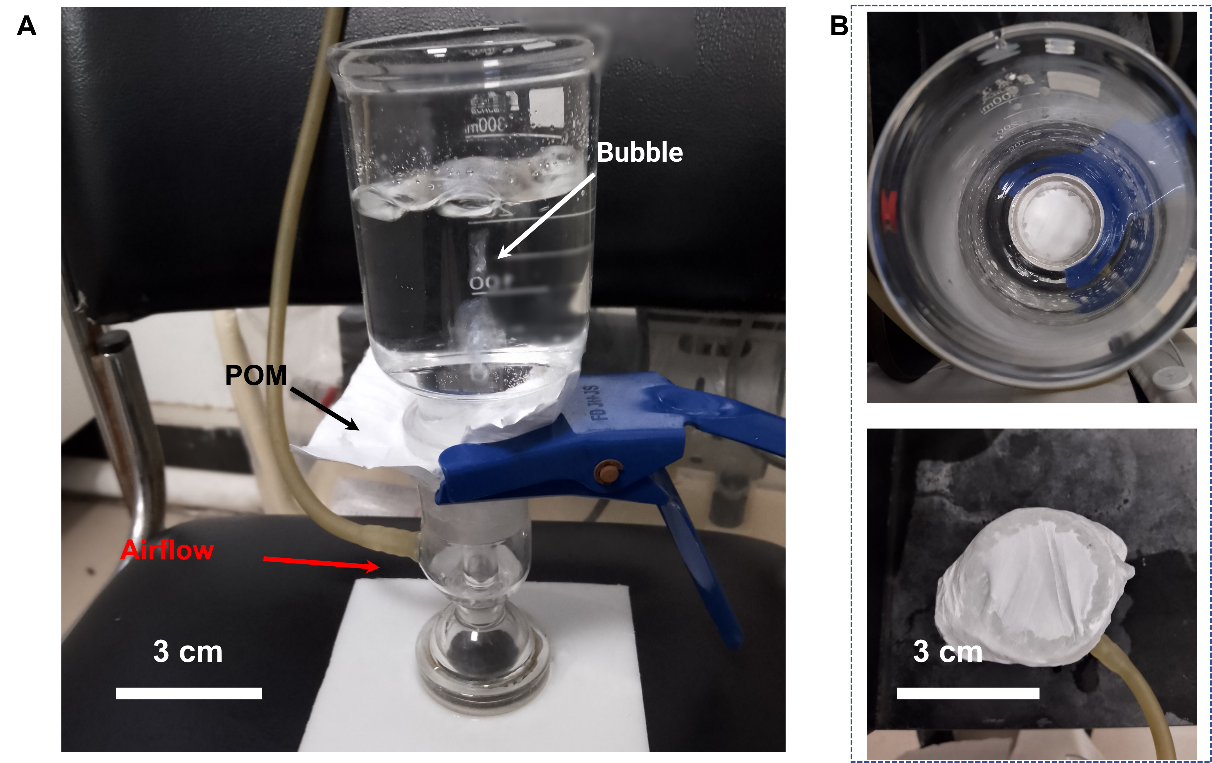
**

**Supplementary Figure 17. Breathability and waterproofness test.** **a**, Digital image of the setup to measure the breathability and waterproofness of the SET-type POM textile. **b**, Digital images of the SET-type POM textile after testing.

**
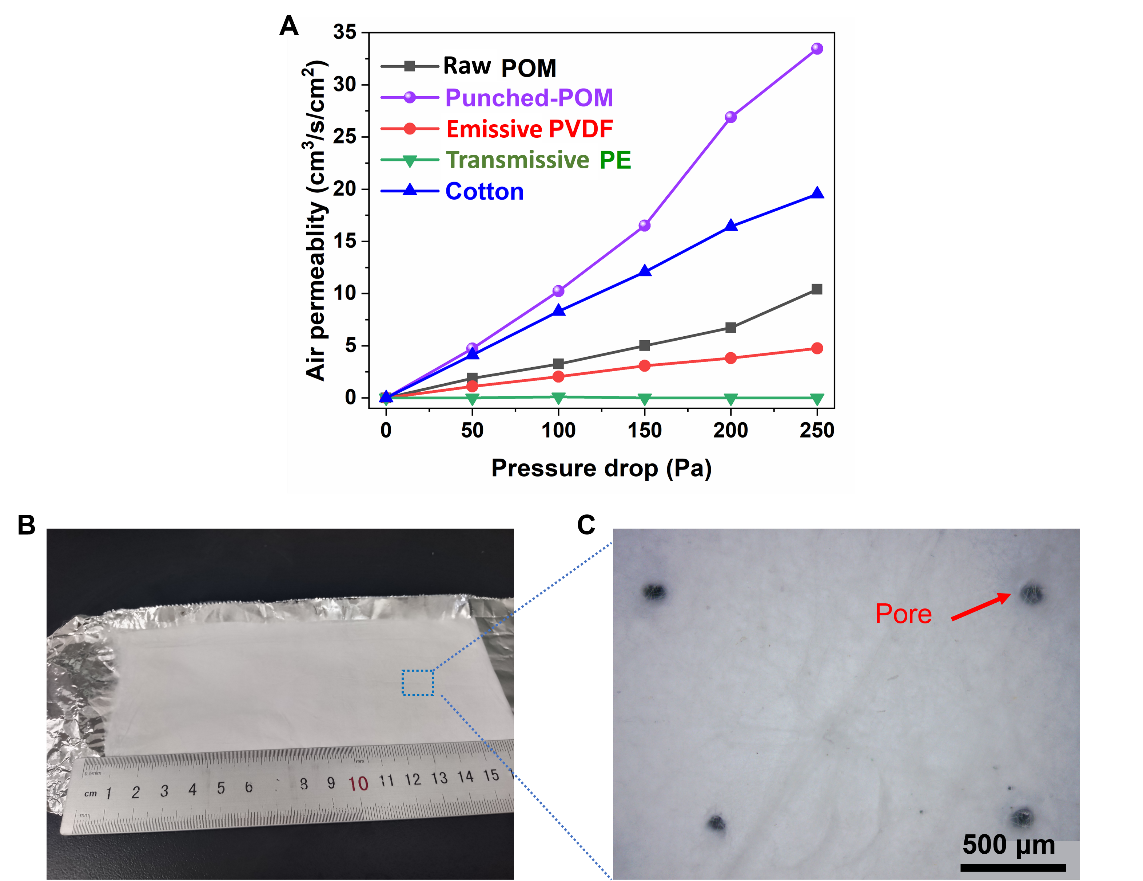
**

**Supplementary Figure 18.** **Air permeability test.** **a**, Air permeability of the raw SET-type POM textile, punched POM textile, emission-type PVDF textile, transmission PE textile, and commercial cotton. (**b** and **c**) Digital (**b**) and optical microscope (**c**) images of the punched POM textile showed that the size and spacing of the microholes were ~100 μm and 1 mm, respectively.


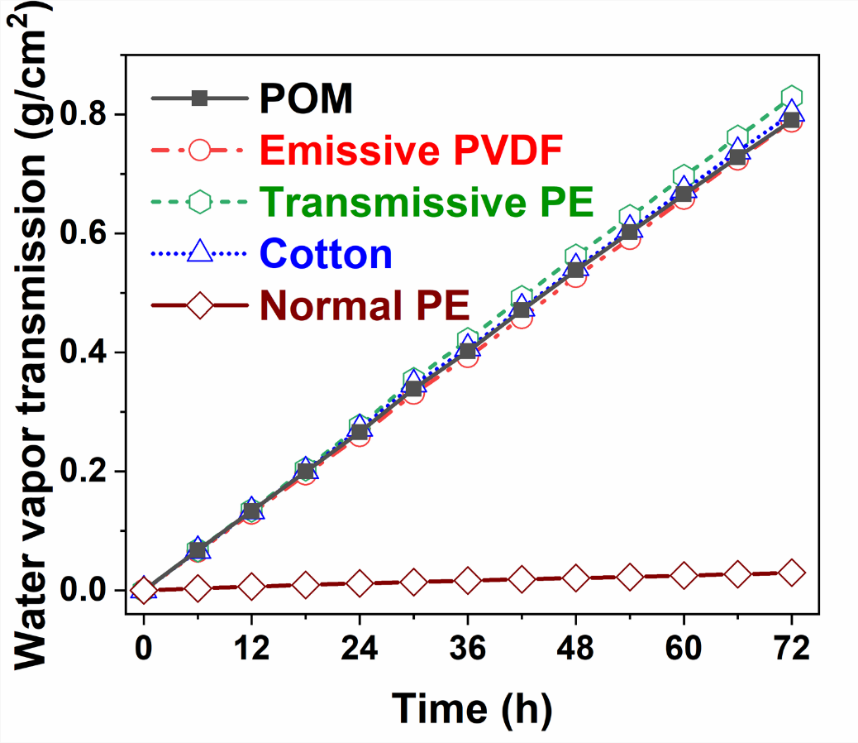


**Supplementary Figure 19.** Water vapor transmission rate versus time of the SET-type POM, commercial cotton, emission-type PVDF, and transmission-type PE textiles (marked as POM, Cotton, Emissive PVDF, and Transmissive PE, respectively). Normal PE film was also employed for comparison. The SET-type POM textile and other three textiles (transmissive PE, emissive PVDF, and cotton) exhibit high Water vapor transmission rates (0.010-0.012 g/cm2 hour). In comparison, the normal PE film without a porous structure was completely impermeable to water vapor.


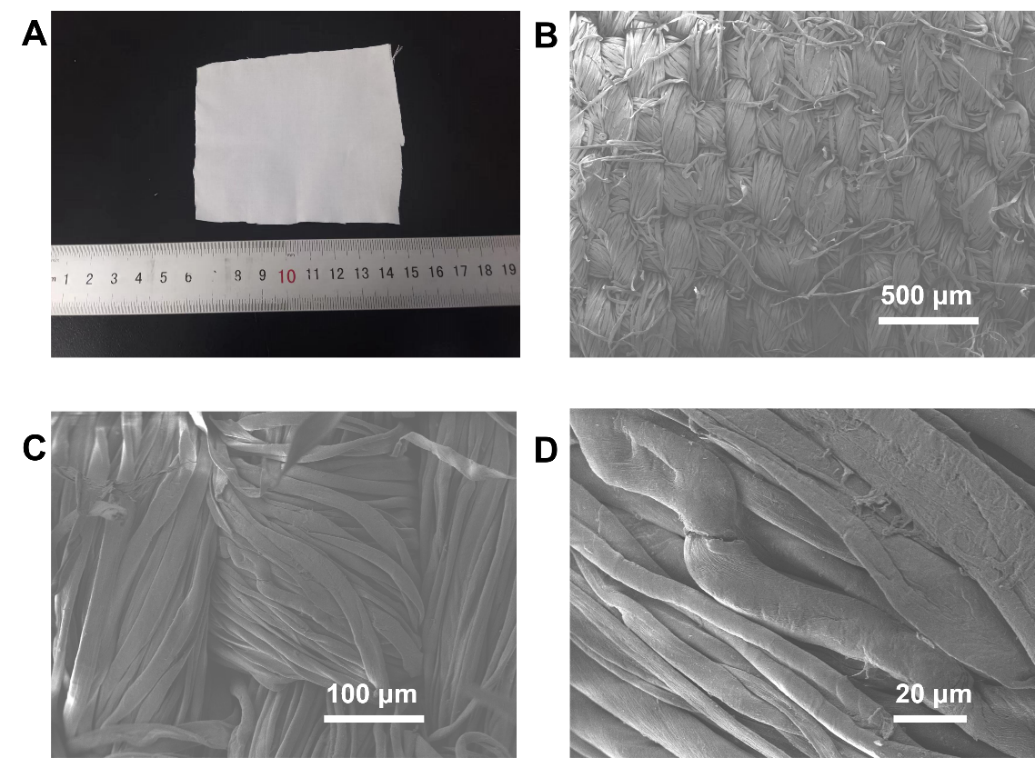


**Supplementary Figure 20. Images of the commercial cotton.** (**a**) Digital and (**b-d**) SEM images of the commercial cotton.


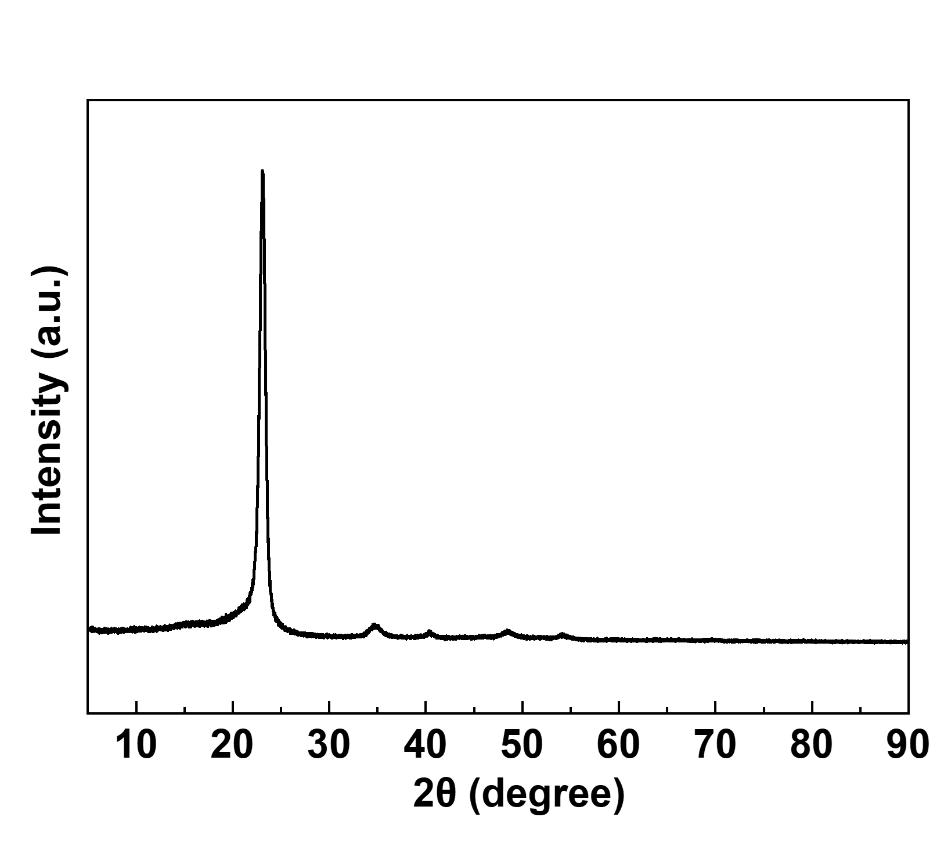


**Supplementary Figure 21.** X-ray diffraction spectrum of the SET-type POM textile.

**
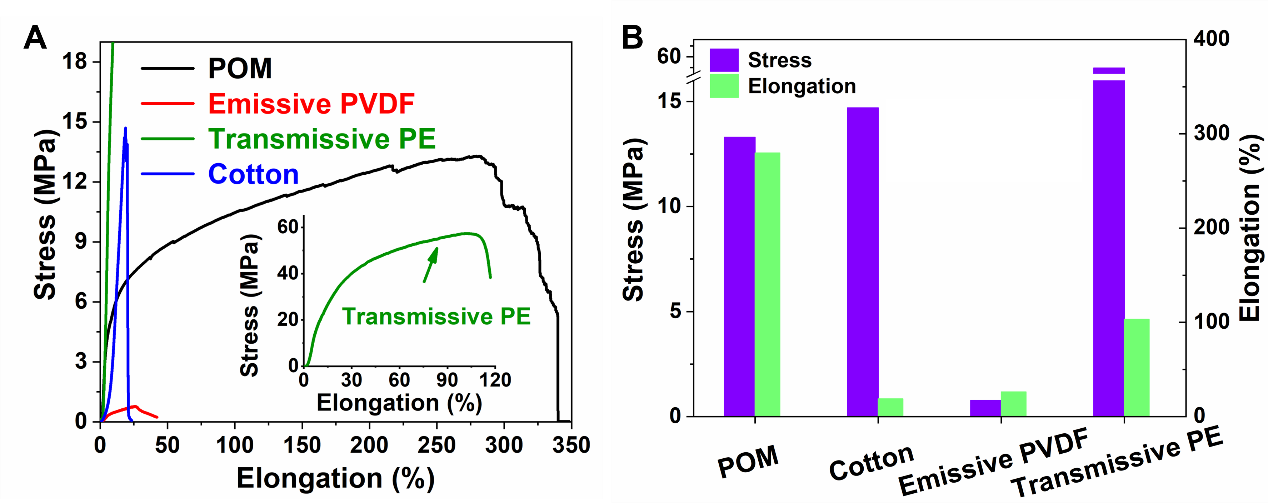
**

**Supplementary Figure 22.** Tensile strength of the SET-type POM textile, commercial cotton, emission-type PVDF, and transmission-type PE. the SET-type POM textile shows a comparable tensile strength with the commercial cotton. The transmissive-type PE has the highest tensile strength (57.4 MPa), but it can withstand only a small force in actual use due to its ultra-thin thickness.


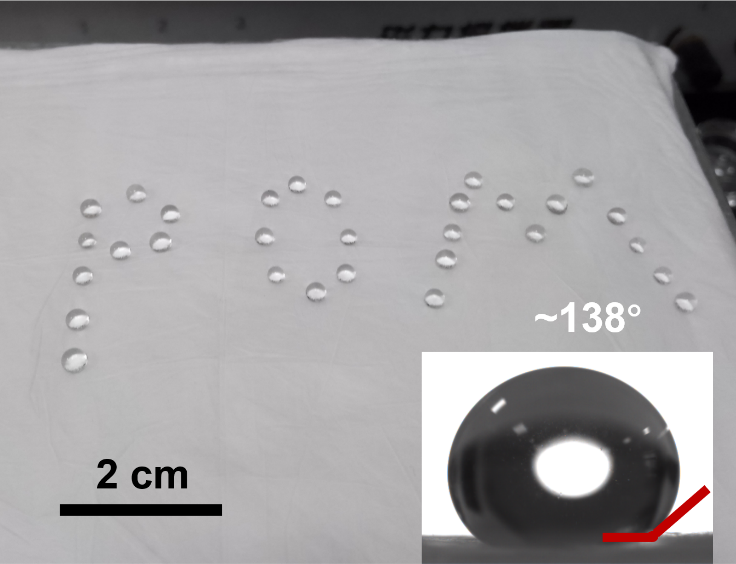


**Supplementary Figure 23.** Hydrophobicity characterization. The inset is the water contact angle of the SET-type POM textile.


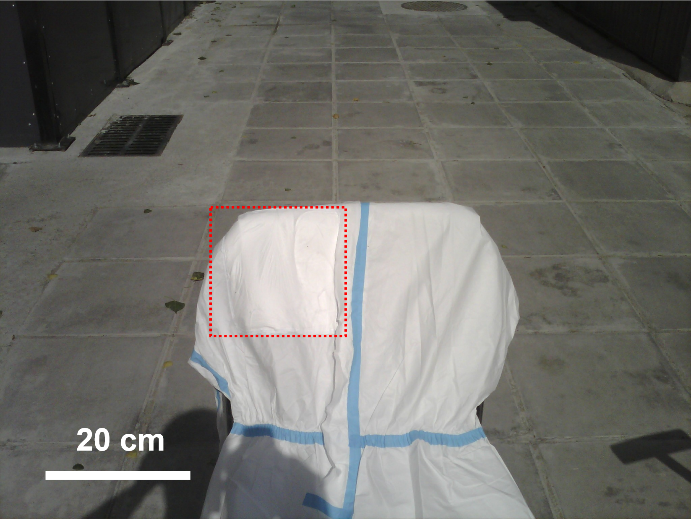


**Supplementary Figure 24.** Digital image of SET-type POM textile based protecting clothing.

**Supplementary Table 1. Input parameters for the heat transfer model analysis.**

| **Symbol/Unit** | **Definition** | **Value** |
| --- | --- | --- |
| *Tamb*/℃ | Ambient air temperature | 25 indoor，  27 outdoor |
| *k*/(*W/m2/K*) | Thermal conductivity | Air *kair* = 0.03;  Textile *ktextile* = 0.31; |
| *d/*μm | Thickness | Air gap: *dair* = 1000  Textile: *dtextile* = 250 |
| *hnon/(W/m2/K)* | Natural convection heat transfer coefficient | 3 |
| *q/(W/m2)* | Metabolic heat flux | 100 |
| *εski*n | MIR emissivity of skin | 0.98 |
| */(W/m2/K4)* | Stefan-Boltzmann constant | 5.67 × 10-8 |
| *Tskin*/℃  *Ttextile-in*/℃  *Ttextile-out*/℃ | Skin/textile inner surface/textile outer surface temperature | Unknown |

**Supplementary Table 2. Extra parameters for the outdoor heat transfer model**

| **Symbol/Unit** | **Definition** | **Value** | | |
| --- | --- | --- | --- | --- |
| **SET Hybrid-type** | **Emission-type** | **Transmission-type** |
| *qsun/(W/m2)* | Solar irradiation | 800 | | |
| *ρskin-sun* | Skin solar reflection | 0.38 | | |
| *εatm* | Atmospheric absorptivity | 0.62 | | |
| *ρsun* | Solar reflectivity | 0.9 | 0.9 | 0.48 |
| *τsun* | Solar transmissivity | 0.1 | 0.1 | 0.42 |

**Supplementary Table 3.** Characteristic peaks and their functional group vibrations in the FTIR-ATR spectrum of the POM.

| **Wavenumber (cm-1)** | **Wavelength (μm)** | **Mode of vibration** |
| --- | --- | --- |
| 1234.6 | 8.1 | Stretching vibration of -CH2 |
| 1087.0 | 9.2 | Stretching vibration of C-O-C |
| 934.6 | 10.7 | Stretching vibration of C-O-C |
| 900.9 | 11.1 | Stretching vibration of C-O-C |
| 628.9 | 15.9 | Formation vibration of O-C-O |
| 456.6 | 21.9 | Skeletal vibration of POM |

**Supplementary references**

1 Hsu, P. C. *et al.* Radiative human body cooling by nanoporous polyethylene textile. *Science* **353**, 1019-1023, (2016).

2 Cai, L. *et al.* Spectrally Selective Nanocomposite Textile for Outdoor Personal Cooling. *Adv. Mater.* **30**, 1802152, (2018).

3 Zeng, S. *et al.* Hierarchical-morphology metafabric for scalable passive daytime radiative cooling. *Science* **373**, 692-696, (2021).

4 Tong, J. K. *et al.* Infrared-Transparent Visible-Opaque Fabrics for Wearable Personal Thermal Management. *Acs Photonics* **2**, 769-778, (2015).
